# Supplementary material for: Insufficient social distancing may contribute to COVID-19 outbreak: The case of Ijuí city in Brazil
Source: PubMed Central journal article supplement (PMC7888680; doi:10.1371/journal.pone.0246520), 2021-02-17
Supplement: pone.0246520.s001.pdf [file pone.0246520.s001.pdf]

# Insufficient social distancing may contribute to COVID-19 outbreak: the case of Ijuí city in Brazil

Thiago Gomes Heck<sup>1,2,3,4\*¶</sup>, Rafael Z. Frantz<sup>4,5¶</sup>, Matias Nunes Frizzo<sup>1,2,3</sup>, Carlos Henrique Ramires François<sup>3</sup>, Mirna Stela Ludwig<sup>1,2,3</sup>, Marilia Arndt Mesenburg<sup>6,7</sup>, Giovano Pereira Buratti<sup>2</sup>,

Lígia Beatriz Bento Franz<sup>2,8</sup>, Evelise Moraes Berlezi<sup>2,3,8</sup>

<sup>1</sup> Research Group in Physiology, Regional University of Northwestern Rio Grande do Sul State, Ijuí, Rio Grande do Sul State, Brazil.

<sup>2</sup> Postgraduate Program in Integral Attention to Health, Regional University of Northwestern Rio Grande do Sul State, Ijuí, Rio Grande do Sul State, Brazil.

<sup>3</sup> Medicine Course, Department of Life Sciences, Regional University of Northwestern Rio Grande do Sul State, Ijuí, Rio Grande do Sul State, Brazil.

<sup>4</sup> Postgraduate Program in Mathematical and Computational Modeling, Ijuí, RS, Brazil.

<sup>5</sup> Department of Exact Sciences and Engineering, Regional University of Northwestern Rio Grande do Sul State, Ijuí, Rio Grande do Sul State, Brazil. <sup>6</sup> Federal University of Pelotas (UFPEl), Pelotas, Rio Grande do Sul State, Brazil.

<sup>7</sup> Federal University of Health Sciences of Porto Alegre (UFCSPA), Porto Alegre, Rio Grande do Sul State, Brazil.

<sup>8</sup> Research Group in Human Aging, Regional University of Northwestern Rio Grande do Sul State, Ijuí, Rio Grande do Sul State, Brazil.

**\*Corresponding author**

**Thiago Gomes Heck, [thiago.heck@unijui.edu.br](mailto:thiago.heck@unijui.edu.br)**

Regional University of Northwestern Rio Grande do Sul State (UNIJUI)

Rua do Comércio, 3000, Bairro Universitário, Ijuí, RS 98700-000, Brazil

**Supplementary Figure S1. Distribution of COVID-19 cases in Urban area of Ijuí in June, August and November.**

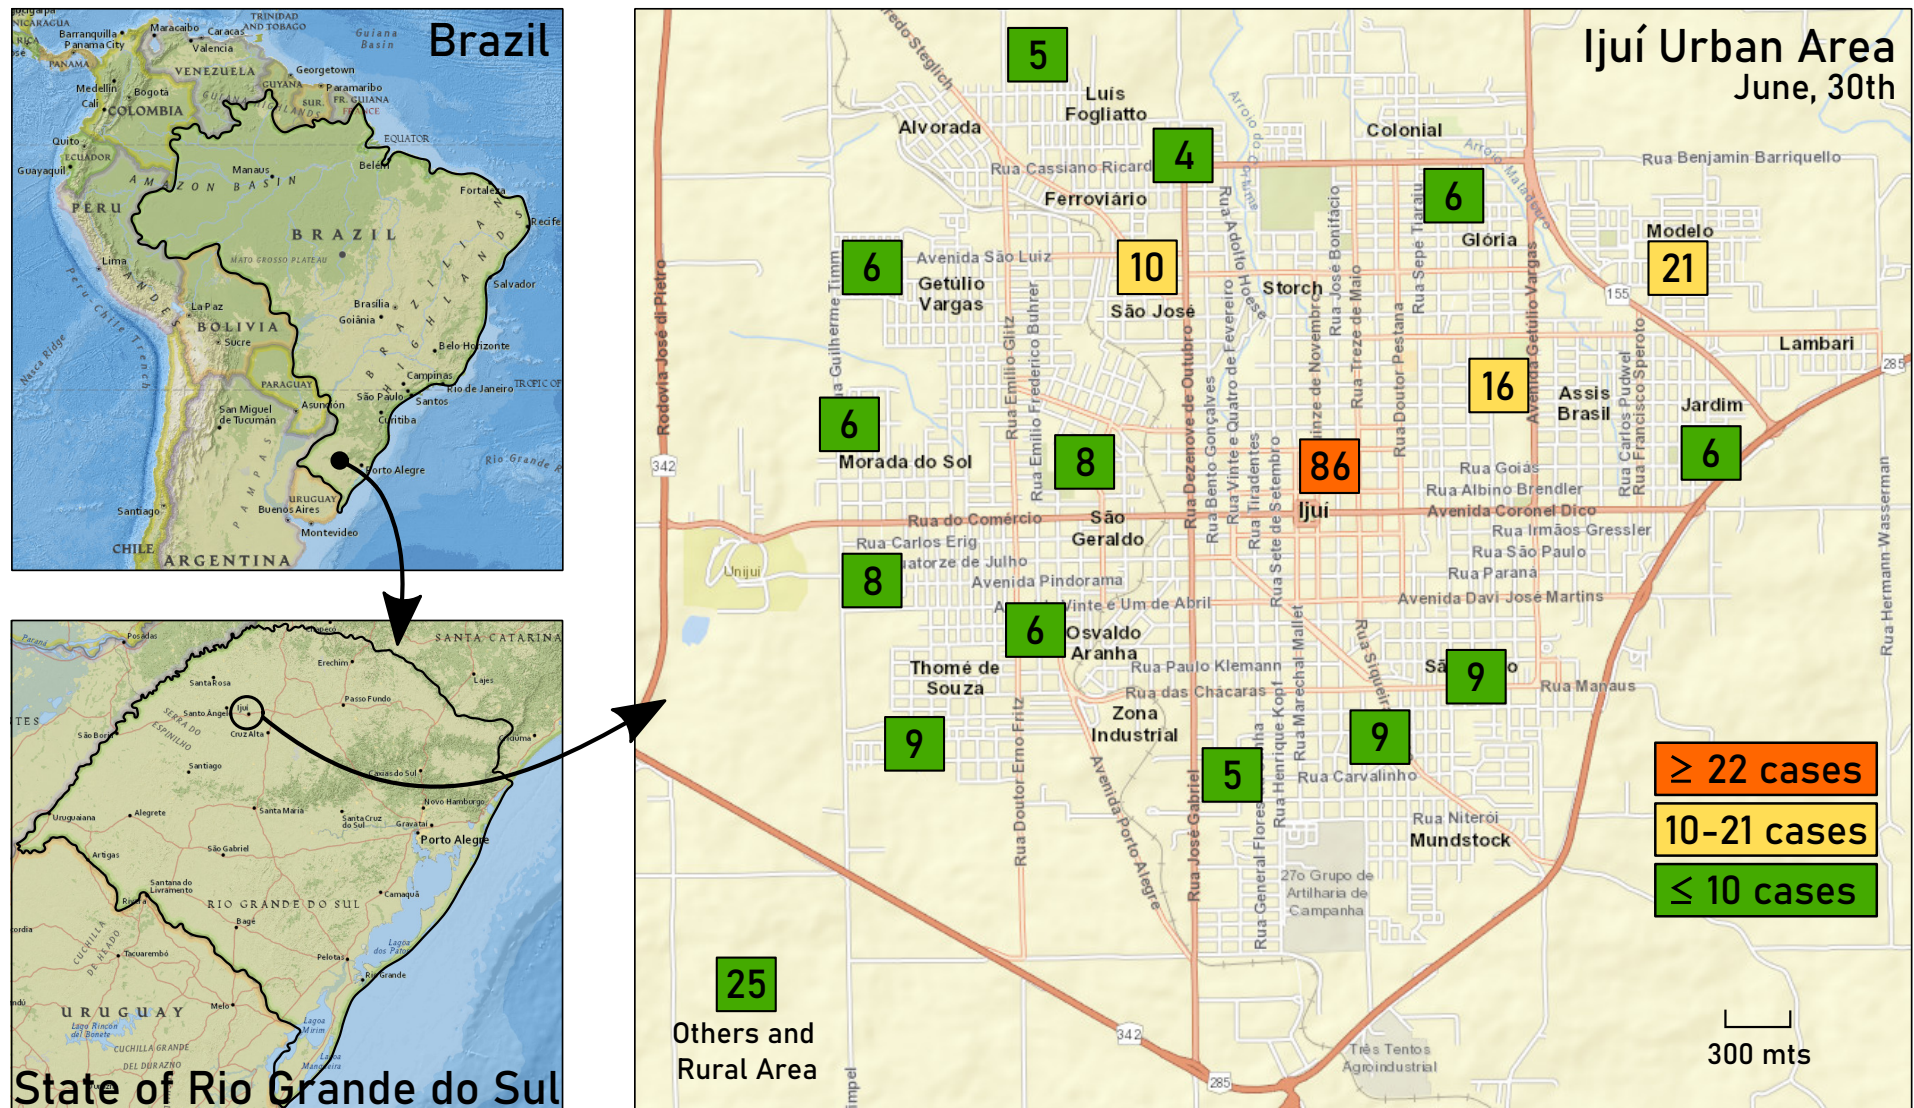

Maps source: U.S. Geological Survey web site  
<https://viewer.nationalmap.gov/advanced-viewer>

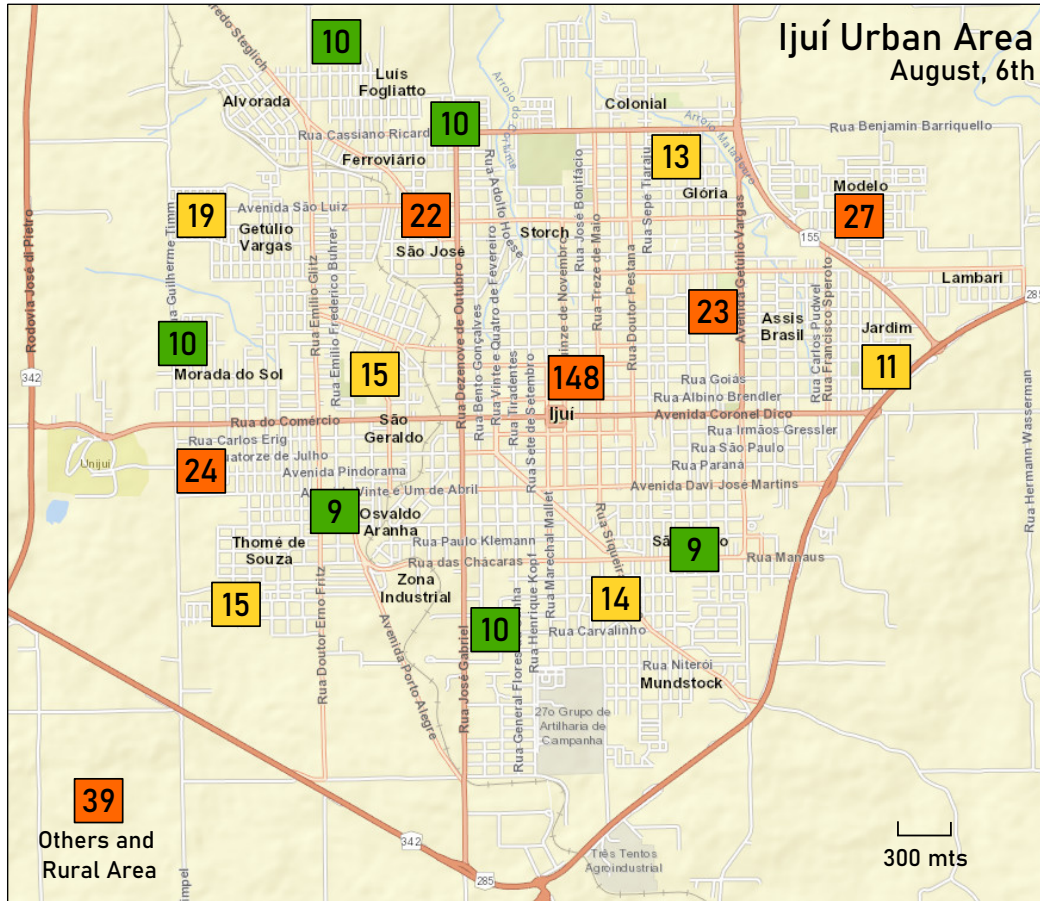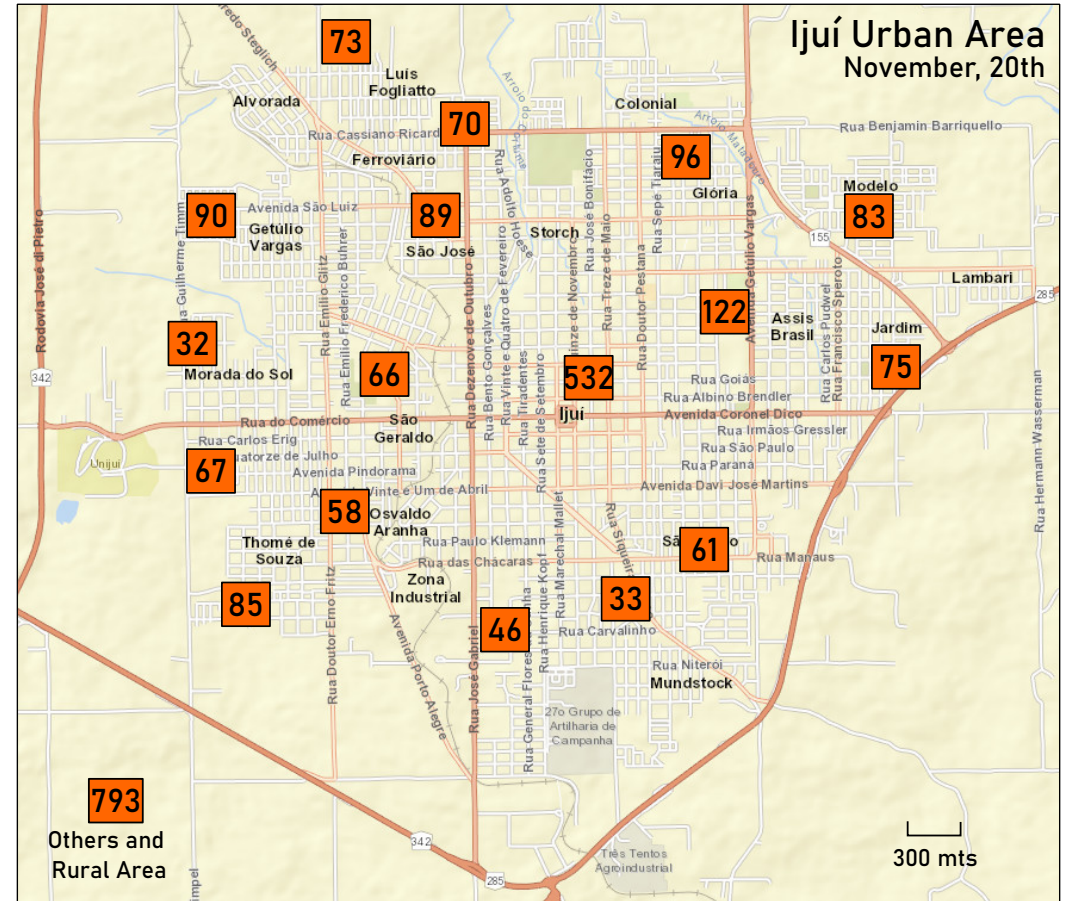

≥ 22 cases

10-21 cases

≤ 10 cases

Maps source: U.S. Geological Survey web site  
<https://viewer.nationalmap.gov/advanced-viewer>

## QUESTIONNAIRE

1- FU: (IBGE FU code)

\_\_\_\_\_

2- ROUND:

\_\_\_\_\_

3- CITY CODE:

\_\_\_\_\_

4- Sector: (TWO DIGITS)

\_\_\_\_\_

5- Sequential number of the interview in the sector: (TWO DIGITS)

\_\_\_\_\_

6- Interviewee's household number: (TWO DIGITS) (ACCORDING TO ADDRESS LIST)

\_\_\_\_\_

7- Number of regular residents in the household  1 resident  2 residents  3 residents  4 residents  5 residents  6 residents  7 residents  8 residents  9 residents  10 residents  11 residents  12 residents  13 residents  14 residents  15 residents

8- Number of the selected resident: (According to resident board) \_\_\_\_\_

9- Name of the selected resident:

\_\_\_\_\_

10- Number of the resident who answers the questionnaire (Consult the resident board)

\_\_\_\_\_



11- Who answers the questionnaire?  The person him/herself  Mother  Father  Guardian or caregiver

12- Gender of (NAME):

- Male  Female

13- What is <NAME>'s date of birth?

\_\_\_ / \_\_\_ / \_\_\_\_\_ (day/month/year)

14- How old is (NAME)? (If less than 1 year, put 0)

\_\_\_\_\_

15- Did (NAME) attend school?

- Yes  
 No

16- (NAME'S) education level:  Preschool education  Incomplete primary school  Complete primary school  Incomplete secondary school  Complete secondary school  Incomplete college/university  Complete college/university  
 Graduate school

17- What was the last grade that (NAME) completed in school?

\_\_\_\_\_

18- What is the education level of the resident who studied the most?  Illiterate/did not study  Preschool education  Incomplete primary school  Complete primary school  Incomplete secondary school  Complete secondary school  Incomplete college/university  Complete college/university  
 Graduate school

19- What was the last grade completed by the resident who studied the most in this household?

\_\_\_\_\_

20- How does (NAME) self-identify in terms of color or race?  White  Brown  Black  Yellow  Indigenous

OBS: this is the standard question used in the Brazilian census

21- In the last two weeks, that is, since (DAY OF THE WEEK) of the week before last, did (NAME) have FEVER:  Yes  No

22- How many days ago did it start?

\_\_\_\_\_

23- Do you still have a fever?  Yes

No

24- For how many days did the fever last?

\_\_\_\_\_

25- In the last two weeks, that is, since (DAY OF THE WEEK) of the week before last, did (NAME) have a SORE THROAT:  Yes  No

26- How many days ago did it start?

\_\_\_\_\_

27- Do you still have a sore throat?  Yes

No

28- For how many days did the sore throat last?

\_\_\_\_\_

29- In the last two weeks, that is, since (DAY OF THE WEEK) of the week before last, did (NAME) have a COUGH:  Yes  No

Always has it/ constantly

30- Was it a wet cough?  Yes  No

31- How many days ago did it start?

\_\_\_\_\_

32- Do you still have a cough?  Yes

No

33- For how many days did the cough last?

\_\_\_\_\_

34- In the last two weeks, that is, since (DAY OF THE WEEK) of the week before last, did (NAME) have DIFFICULTY BREATHING:  Yes  No

- Always has it/constantly

35- Was your nose blocked?

- Yes  No

36- How many days ago did it start?

\_\_\_\_\_

37- Do you still have difficulty breathing?  Yes

- No

38- For how many days did the difficulty breathing last?

\_\_\_\_\_

39- In the last two weeks, that is, since (DAY OF THE WEEK) of the week before last, did (NAME) have HEART PALPITATIONS, A RACING OR IRREGULAR HEARTBEAT:

- Yes  No
- Always has them/ constantly

40- How many days ago did they start?

\_\_\_\_\_

41- Do you still have this heart problem?  Yes

- No

42- For how many days did the heart palpitations last?

\_\_\_\_\_

43- In the last two weeks, that is, since (DAY OF THE WEEK) of the week before last, did (NAME) start to have TROUBLE SMELLING OR TASTING THINGS?  Yes

- No

44- How many days ago did it start?

\_\_\_\_\_

45- Do you still have this problem?  Yes  No

46- For how many days were you unable to smell or taste things?

\_\_\_\_\_

47- In the last two weeks, that is, since (DAY OF THE WEEK) of the week before last, did (NAME) have DIARRHEA:  Yes

No

48- How many days ago did it start?

\_\_\_\_\_

49- Do you still have diarrhea?

Yes

No

50- For how many days did the diarrhea last?

\_\_\_\_\_

51- In the last two weeks, that is, since (DAY OF THE WEEK) of the week before last, did (NAME) suffer VOMITING:  Yes

No

52- How many days ago did it start?

\_\_\_\_\_

53- Do you still suffer vomiting?  Yes  No

54- For how many days did the vomiting last?

\_\_\_\_\_

55- Has any doctor ever said that (NAME) has:

|                                     | Yes                   | No                    |
|-------------------------------------|-----------------------|-----------------------|
| Hypertension or high blood pressure | <input type="radio"/> | <input type="radio"/> |
| Diabetes or high blood sugar        | <input type="radio"/> | <input type="radio"/> |
| Asthma or bronchitis                | <input type="radio"/> | <input type="radio"/> |
| Cancer (any type)                   | <input type="radio"/> | <input type="radio"/> |



|                         |                       |                       |
|-------------------------|-----------------------|-----------------------|
| Chronic kidney disease  | <input type="radio"/> | <input type="radio"/> |
| Any heart disease       | <input type="radio"/> | <input type="radio"/> |
| Another chronic disease | <input type="radio"/> | <input type="radio"/> |

56- Did (NAME) seek a health service in the last 15 days?

- Yes
- No

57- What kind of health service?

- Health center  Emergency room  Private doctor  Hospital
- Other health service

58- Why did you seek the service?  Vaccination  Preexisting health problem  Scheduled return visit  Flu symptoms or sore throat  To obtain medication

- Other reason

59- Regarding the social distancing that is being recommended by health authorities, that is, staying at home and avoiding contact with other people, how much does (NAME) think he/she is managing to do? (read alternatives)

- Very little
- Little
- More or less
- A lot
- Practically isolated from everyone

60- What has (NAME)'s activity routine been like? (read alternatives)  Stay home all the time

- Go out only for essential things like buying food  Go out from time to time to shop and stretch your legs  Go out every day for some activity
- Go out every day, all day, for work or other regular activity

61- Thinking about the home routine, who enters the house? (read alternatives)

- Only family members who live together, if any, and no one else  Some close relatives visit 1-2 times a week  Some close relatives visit almost every day  Friends, relatives, or others who visit 1-2 times a week  Friends, relatives, or others who visit almost every day

62- TEST IDENTIFICATION: (NUMBER: ROUND + MUNICIPALITY + SECTOR + HOUSEHOLD) (READ OUT LOUD)

---

63- TEST RESULT:  POSITIVE  NEGATIVE

INCONCLUSIVE

64- IF POSITIVE, MARK THE RESIDENTS TO BE TESTED: (SEE HOUSEHOLD TABLE)  Resident 1  Resident 2  Resident 3  Resident 4  Resident 5  Resident 6  Resident 7  Resident 8  Resident 9  Resident 10  Resident 11  Resident 12  Resident 13  Resident 14  Resident 15

65- Interviewee name:

---

66- Contact phone:

( ) \_\_\_\_\_ - \_\_\_\_\_

## QUESTIONÁRIO

**1 - UF: (código da UF IBGE)**

---

**2 - Rodada:**

---

**3 - Cidade: (Código)**

---

**4 - Setor: (DOIS DÍGITOS)**

---

**5 - Número sequencial da entrevista no setor: (DOIS DÍGITOS)**

---

**6 - Número do domicílio do entrevistado: (DOIS DÍGITOS)**

---

1 morador

2 moradores

3 moradores

4 moradores

5 moradores

6 moradores

7 moradores

8 moradores

9 moradores **7 - Número de moradores regulares no domicílio:**

10 moradores

11 moradores

12 moradores

13 moradores

14 moradores

15 moradores

**8 - Número do morador selecionado: (Consultar quadro de moradores)**

---

**9 - Nome do morador selecionado:**

---

**10 - Nº do morador entrevistado (Consultar quadro de moradores):**

---

**11 - Quem responde o questionário?**

- A própria pessoa
- Mãe  Pai
- Outro responsável ou cuidador

**12 - Sexo de (NOME):**

- Masculino  Feminino

**13 - Qual a data de nascimento de (NOME)? (dd/mm/aaaa)**

\_\_/\_\_/\_\_\_\_\_

**14 - Qual idade de (NOME)? (Se for menor que 1 ano, colocar 0)**

---

**15 - (NOME) frequentou escola?**

- Sim  Não

**16 - Grau de escolaridade de (NOME):**

- Educação infantil
- Fundamental incompleto  Fundamental completo  Médio incompleto

Médio completo  Superior incompleto  Superior completo  Pós graduação 17 - Qual foi a última série/ano que (NOME) completou na escola?

---

18 - Qual o grau escolaridade do morador que mais estudou?

Analfabeto/não estudou  Educação infantil  Fundamental incompleto  Fundamental completo  Médio incompleto  Médio completo  Superior incompleto  Superior completo  Pós graduação 19 - Qual foi a última série/ano completada pelo morador que mais estudou nesta casa?

---

20 - Como (NOME) se classifica em termos de cor ou raça?

Branca  Branca Parda  Preta  Amarela  Indígena

21- Nas últimas duas semanas, isto é, desde (DIA DA SEMANA) da semana retrasada, (NOME) teve FEBRE:

Sim  Não

21 - Começou há quantos dias?

---

22 - Ainda tem febre?

Sim  Não 23 - Quantos

dias durou a febre?

---

**24 - Nas últimas duas semanas, isto é, desde (DIA DA SEMANA) da semana retrasada, (NOME) DOR DE GARGANTA:**

Sim  Não

Tem sempre/constantemente

**25 - Começou há quantos dias?**

---

**26 - Ainda tem dor de garganta?**

Sim  Não **27 - Quantos dias durou a**

**dor de garganta?**

---

**28 - Nas últimas duas semanas, isto é, desde (DIA DA SEMANA) da semana retrasada, (NOME) TOSSE:**

Sim  Não

Tem sempre/constantemente **29**

**- A tosse era com catarro?**

Sim  Não **30 -**

**Começou há quantos dias?**

---

**31 - Ainda tem tosse?**

Sim  Não

**32 - Quantos dias durou a tosse?**

**33- Nas últimas duas semanas, isto é, desde (DIA DA SEMANA) da semana retrasada, (NOME) DIFICULDADE DE RESPIRAR:**

Sim  Não

Tem sempre/constantemente 33

- O nariz estava entupido?

Sim  Não 34 -

Começou há quantos dias?

---

35 - Ainda tem dificuldade de respirar?

Sim  Não 36 - Quantos dias durou a

dificuldade de respirar?

---

37 - Nas últimas duas semanas, isto é, desde (DIA DA SEMANA) da semana retrasada, (NOME) teve PALPITAÇÃO, CORAÇÃO DISPARADO OU BATEDEIRA NO CORAÇÃO:

Sim  Não

Tem sempre/constantemente

38 - Começou há quantos dias?

---

39 - Ainda tem esse problema no coração?

Sim  Não 40 - Quantos dias durou a

palpitação no coração?

---

41 - Nas últimas duas semanas, isto é, desde (DIA DA SEMANA) da semana retrasada, (NOME) PASSOU A SENTIR MENOS O CHEIRO OU O GOSTO DAS COISAS?



Sim  Não

42 - Começou há quantos dias?

---

43 - Ainda está tendo esse problema?

Sim  Não 44 - Quantos dias ficou sem o cheiro ou o

gosto das coisas?

---

Sim

Não

45 - Nas últimas duas semanas, isto é, desde (DIA DA SEMANA) da semana retrasada, (NOME) teve DIARREIA:

46 - Começou há quantos dias?

---

47 - Ainda está com diarreia?

Sim  Não 48 - Quantos

dias durou a diarreia?

---

49 - Nas últimas duas semanas, isto é, desde (DIA DA SEMANA) da semana retrasada, (NOME) teve VÔMITOS:

Sim  Não 50 - Começou há quantos dias?

---

51 - Ainda tem vômitos?

Sim  Não 52 - Quantos dias

duraram os vômitos?

**53 - Algum médico já disse que (NOME) tem**

|                               | Sim                   | Não                   |
|-------------------------------|-----------------------|-----------------------|
| Hipertensão ou pressão alta?  | <input type="radio"/> | <input type="radio"/> |
| Diabetes ou açúcar no sangue? | <input type="radio"/> | <input type="radio"/> |
| Asma ou bronquite?            | <input type="radio"/> | <input type="radio"/> |
| Câncer (qualquer tipo)?       | <input type="radio"/> | <input type="radio"/> |
| Doença crônica nos rins?      | <input type="radio"/> | <input type="radio"/> |
| Alguma doença no coração?     | <input type="radio"/> | <input type="radio"/> |
| Outra doença crônica?         | <input type="radio"/> | <input type="radio"/> |

**54 - (NOME) foi a algum serviço de saúde nos últimos 15 dias?** Sim Não

**55 - Que tipo de serviço de saúde?**

Postinho

Pronto Atendimento ou Pronto Socorro  Médico particular

Hospital

Outro serviço

**56 - Por qual motivo procurou o serviço?**

Vacinação

- Problema de saúde já existente
- Retorno agendado
- Sintomas de gripe ou dor de garganta
- Buscar remédio
- Outro motivo

**57 - Com relação ao distanciamento social que está sendo orientado pelas autoridades de saúde, ou seja, ficar em casa e evitar contato com outras pessoas, quanto (NOME) acha que está conseguindo fazer? (ler as alternativas)**

- Muito pouco  Pouco
- Mais ou menos  Bastante
- Praticamente isolado de todo mundo

**58 - Como tem sido a rotina de atividades de (NOME)? (ler as alternativas)**

- Fica em casa o tempo todo
- Sai apenas para coisas essenciais como comprar comida  Sai de vez em quando para compras e esticar as pernas  Sai todos os dias para alguma atividade
- Sai todos os dias, o dia todo, para trabalhar ou outra atividade regular

**59 - Pensando na rotina da casa, quem tem entrado na casa? (ler as alternativas)**

- Só os familiares que moram junto, se tiver, e mais ninguém
- Alguns parentes próximos visitam 1 a 2 vezes por semana
- Alguns parentes próximos visitam quase que todos os dias
- Amigos e parentes visitam 1 a 2 vezes por semana
- Amigos e parentes visitam quase todos os dias

**60 - IDENTIFICAÇÃO DO TESTE: (Nº: RODADA+MUNICÍPIO+SETOR+DOMICÍLIO) (LER EM VOZ ALTA)**

**65 - RESULTADO DO TESTE:**

POSITIVO  NEGATIVO

INCONCLUSIVO

**66 - SE POSITIVO, MARQUE OS MORADORES QUE SERÃO TESTADOS: (VER QUADRO DO DOMICÍLIO)**

Morador 1

Morador 2

Morador 3

Morador 4

Morador 5

Morador 6

Morador 7

Morador 8

Morador 9

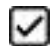

Morador 10

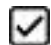

Morador 11

Morador 12

Morador 13

Morador 14

Morador 15

**68 - Nome do entrevistado(a):**

---

**69 - Telefone para contato:**

( ) \_\_\_\_\_ - \_\_\_\_\_
